# Supplementary material for: Reduced size at birth and persisting reductions in adiposity in recent, compared with earlier, cohorts of infants born to mothers with gestational diabetes mellitus
Source: Springer Nature journal article supplement (doi:10.1007/s00125-019-4970-6), 2019-08-09
Supplement: MOESM1 [file 17053864]

ESM Table 1. Comparison of individual skinfold thickness SDS (internally derived) between 'recent' or 'earlier' OGDM versus controls

|                  | Control            | 'Recent' OGDM      | 'Earlier' OGDM    |
|------------------|--------------------|--------------------|-------------------|
| <b>Birth</b>     | <b>Total n=780</b> | <b>Total n=122</b> | <b>Total n=91</b> |
| Triceps          | 0.04 ± 1.03        | -0.42 ± 0.65**     | 0.30 ± 0.97*      |
| Subscapular      | 0.02 ± 1.02        | -0.22 ± 0.87*      | 0.17 ± 1.01       |
| Flank            | 0.05 ± 0.97        | -0.59 ± 0.64**     | 0.45 ± 1.26**     |
| Quadriceps       | 0.04 ± 1.03        | -0.40 ± 0.66**     | 0.32 ± 1.01*      |
| <b>3 months</b>  | <b>Total n=710</b> | <b>Total n=102</b> | <b>Total n=91</b> |
| Triceps          | 0.02 ± 1.04        | -0.27 ± 0.75*      | 0.18 ± 0.92       |
| Subscapular      | -0.01 ± 1.00       | 0.14 ± 0.98        | -0.09 ± 1.01      |
| Flank            | 0.00 ± 1.03        | -0.03 ± 0.83       | 0.01 ± 0.92       |
| Quadriceps       | 0.01 ± 1.03        | -0.13 ± 0.77       | 0.09 ± 0.97       |
| <b>12 months</b> | <b>Total n=621</b> | <b>Total n=86</b>  | <b>Total n=77</b> |
| Triceps          | 0.03 ± 1.02        | -0.47 ± 0.85**     | 0.27 ± 0.88       |
| Subscapular      | 0.01 ± 1.02        | -0.09 ± 0.97       | 0.05 ± 0.90       |
| Flank            | 0.03 ± 1.01        | -0.38 ± 0.80**     | 0.24 ± 1.04       |
| Quadriceps       | 0.04 ± 1.00        | -0.50 ± 0.90**     | 0.29 ± 0.98       |
| <b>24 months</b> | <b>Total n=710</b> | <b>Total n=102</b> | <b>Total n=91</b> |
| Triceps          | 0.02 ± 1.03        | -0.28 ± 0.87*      | 0.16 ± 0.88       |
| Subscapular      | 0.01 ± 1.04        | -0.13 ± 0.82       | 0.07 ± 0.81       |
| Flank            | 0.03 ± 1.04        | -0.43 ± 0.68**     | 0.26 ± 0.79       |
| Quadriceps       | 0.03 ± 1.02        | -0.44 ± 0.78**     | 0.25 ± 0.92       |

Values are mean ± SD, or %  
SDS, standard deviation score (internally derived)

\*p<0.05 vs. control group

\*\*p<0.005 vs. control group

Comparisons are adjusted for sex and postnatal age at measurement. Comparisons at birth and age 3 months are additionally adjusted for gestational age.

ESM Table 2. Linear regression comparison of infant growth parameters between 'Earlier' OGDM and controls, with/without untreated subjects.

Model 1: adjusted for gestational age (birth and 3 months growth outcomes only), sex, and age at measurement  
 Model 2: Model 1 + adjusted for pre-pregnancy maternal BMI, maternal height (for length and height gain only), parity (primiparous, yes/no), feeding history (exclusively breastfed at 3 months, yes/no; except for birth anthropometry), maternal ethnicity (Caucasian descent, yes/no), index of multiple deprivation, delivery method (Caesarean delivery, yes/no), maternal smoking history during pregnancy (yes/no).

$\beta$  (regression coefficients)  $\pm$ SE are displayed

| Outcomes                  |         |                                | 'Earlier' OGDM vs. Controls      |                   |
|---------------------------|---------|--------------------------------|----------------------------------|-------------------|
|                           |         |                                | $\beta \pm SE$                   | <i>p</i>          |
| <b>At birth</b>           |         |                                |                                  |                   |
| Weight SDS                | Model 1 | Include all subjects           | <b>0.27<math>\pm</math>0.06</b>  | <b>&lt;0.0001</b> |
|                           |         | Without 19% untreated subjects | <b>0.26<math>\pm</math>0.06</b>  | <b>&lt;0.0001</b> |
|                           | Model 2 | Include all subjects           | <b>0.15<math>\pm</math>0.06</b>  | <b>0.01</b>       |
|                           |         | Without 19% untreated subjects | 0.12 $\pm$ 0.07                  | 0.064             |
| Length SDS                | Model 1 | Include all subjects           | <b>0.14<math>\pm</math>0.06</b>  | <b>0.015</b>      |
|                           |         | Without 19% untreated subjects | <b>0.13<math>\pm</math>0.06</b>  | <b>0.048</b>      |
|                           | Model 2 | Include all subjects           | 0.08 $\pm$ 0.06                  | 0.201             |
|                           |         | Without 19% untreated subjects | 0.05 $\pm$ 0.07                  | 0.462             |
| Skinfolds SDS             | Model 1 | Include all subjects           | <b>0.13<math>\pm</math>0.05</b>  | <b>0.015</b>      |
|                           |         | Without 19% untreated subjects | <b>0.16<math>\pm</math>0.06</b>  | <b>0.005</b>      |
|                           | Model 2 | Include all subjects           | 0.02 $\pm$ 0.06                  | 0.699             |
|                           |         | Without 19% untreated subjects | 0.05 $\pm$ 0.06                  | 0.382             |
| <b>Change 0-3 months</b>  |         |                                |                                  |                   |
| Weight SDS                | Model 1 | Include all subjects           | -0.10 $\pm$ 0.06                 | 0.085             |
|                           |         | Without 19% untreated subjects | -0.12 $\pm$ 0.07                 | 0.079             |
|                           | Model 2 | Include all subjects           | -0.06 $\pm$ 0.07                 | 0.338             |
|                           |         | Without 19% untreated subjects | -0.05 $\pm$ 0.07                 | 0.529             |
| Length SDS                | Model 1 | Include all subjects           | -0.06 $\pm$ 0.05                 | 0.2               |
|                           |         | Without 19% untreated subjects | -0.085 $\pm$ 0.05                | 0.117             |
|                           | Model 2 | Include all subjects           | -0.07 $\pm$ 0.05                 | 0.205             |
|                           |         | Without 19% untreated subjects | -0.097 $\pm$ 0.06                | 0.107             |
| Skinfolds SDS             | Model 1 | Include all subjects           | -0.12 $\pm$ 0.07                 | 0.073             |
|                           |         | Without 19% untreated subjects | <b>-0.16<math>\pm</math>0.07</b> | <b>0.024</b>      |
|                           | Model 2 | Include all subjects           | 0.003 $\pm$ 0.07                 | 0.967             |
|                           |         | Without 19% untreated subjects | -0.03 $\pm$ 0.08                 | 0.671             |
| <b>Change 3-12 months</b> |         |                                |                                  |                   |
| Weight SDS                | Model 1 | Include all subjects           | -0.1 $\pm$ 0.06                  | 0.07              |
|                           |         | Without 19% untreated subjects | -0.11 $\pm$ 0.06                 | 0.079             |

|                            |         |                                |                   |              |
|----------------------------|---------|--------------------------------|-------------------|--------------|
|                            | Model 2 | Include all subjects           | -0.07±0.06        | 0.234        |
|                            |         | Without 19% untreated subjects | -0.08±0.07        | 0.251        |
| Length SDS                 | Model 1 | Include all subjects           | <b>-0.14±0.06</b> | <b>0.015</b> |
|                            |         | Without 19% untreated subjects | <b>-0.15±0.06</b> | <b>0.017</b> |
|                            | Model 2 | Include all subjects           | -0.09±0.06        | 0.13         |
|                            |         | Without 19% untreated subjects | -0.07±0.07        | 0.31         |
| Skinfolds SDS              | Model 1 | Include all subjects           | <b>0.13±0.06</b>  | <b>0.023</b> |
|                            |         | Without 19% untreated subjects | <b>0.14±0.06</b>  | <b>0.034</b> |
|                            | Model 2 | Include all subjects           | 0.1±0.07          | 0.123        |
|                            |         | Without 19% untreated subjects | 0.11±0.07         | 0.147        |
| <b>Change 12-24 months</b> |         |                                |                   |              |
| Weight SDS                 | Model 1 | Include all subjects           | -0.01±0.04        | 0.8          |
|                            |         | Without 19% untreated subjects | -0.01±0.04        | 0.803        |
|                            | Model 2 | Include all subjects           | -0.02±0.04        | 0.702        |
|                            |         | Without 19% untreated subjects | -0.01±0.04        | 0.758        |
| Length SDS                 | Model 1 | Include all subjects           | 0.01±0.04         | 0.9          |
|                            |         | Without 19% untreated subjects | 0.01±0.04         | 0.779        |
|                            | Model 2 | Include all subjects           | 0.03±0.04         | 0.541        |
|                            |         | Without 19% untreated subjects | 0.03±0.05         | 0.524        |
| Skinfolds SDS              | Model 1 | Include all subjects           | -0.03±0.05        | 0.5          |
|                            |         | Without 19% untreated subjects | -0.04±0.06        | 0.486        |
|                            | Model 2 | Include all subjects           | -0.05±0.06        | 0.379        |
|                            |         | Without 19% untreated subjects | -0.05±0.06        | 0.453        |
